# Supplementary material for: Single-Cell RNA-Seq Revealed the Gene Expression Pattern during the In Vitro Maturation of Donkey Oocytes
Source: MDPI journal article supplement (doi:10.3390/genes12101640), 2021-10-19
Supplement: s1 [file s1]

**Table S1.** Primers used for qRT-PCR.

| <b>Name</b>     | <b>Sequence (5'-3')</b> | <b>product length(bp)</b> | <b>Tm(°C)</b> | <b>Reference/accession numbers</b> |
|-----------------|-------------------------|---------------------------|---------------|------------------------------------|
| <i>GDF9-F</i>   | CCCCGCAAAGATACAACCCT    | 133                       | 60            | XM_014856804.1                     |
| <i>GDF9-R</i>   | GGTCTTGGAAGTGGAGAGTC    |                           |               |                                    |
| <i>BMP15-F</i>  | AGAGCCACTGTGGTTTACCG    | 187                       | 60            | XM_014827162.1                     |
| <i>BMP15-R</i>  | GCCTTTGCCGAATGTGTTGT    |                           |               |                                    |
| <i>LGALS3-F</i> | AAGGGAAGAAAGACAGGCGG    | 104                       | 60            | XM_014864690.1                     |
| <i>LGALS3-R</i> | GAGCATCATTGACCGCAACC    |                           |               |                                    |
| <i>ALG5-F</i>   | GCTGGTGAAGAATCGTGGGA    | 239                       | 60            | XM_014862690.1                     |
| <i>ALG5-R</i>   | GTAGCGATGAAAACGTCCGC    |                           |               |                                    |
| <i>ACTB-R</i>   | CCACCATGTACCCAGGCATT    | 189                       | 60            | XM_014835097.1                     |
| <i>ACTB-F</i>   | CGGACTCATCGTACTCCTGC    |                           |               |                                    |

Note: F, forward; R, reverse.
